# Supplementary material for: Potential Impact of ALKBH5 and YTHDF1 on Tumor Immunity in Colon Adenocarcinoma
Source: PubMed Central journal article supplement (PMC8165310; doi:10.3389/fonc.2021.670490), 2021-05-17

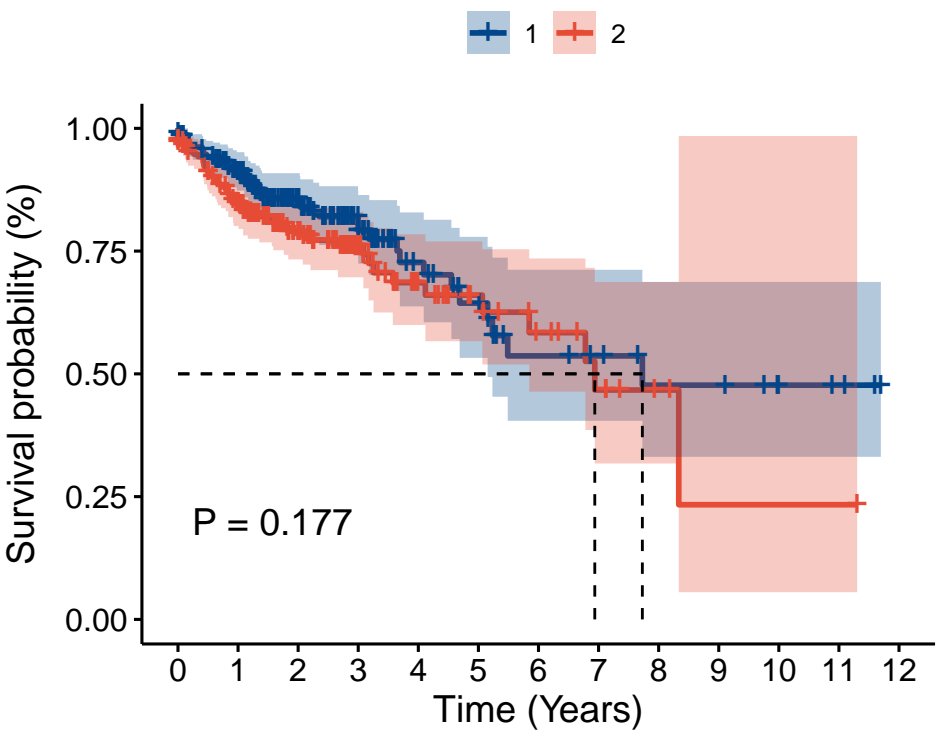

### Number at risk

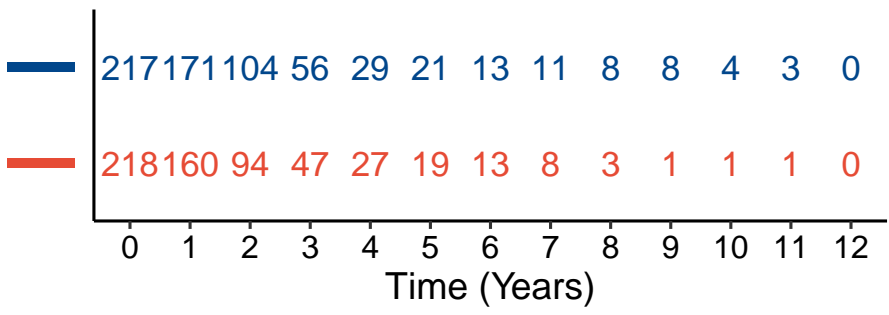

### Number of censoring

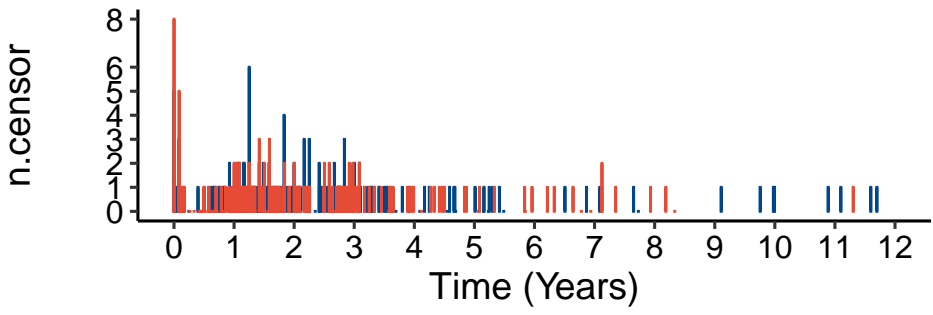

Supplement: Image_3.pdf [file Image_3.pdf]
