# Supplementary material for: Potential Impact of ALKBH5 and YTHDF1 on Tumor Immunity in Colon Adenocarcinoma
Source: PubMed Central journal article supplement (PMC8165310; doi:10.3389/fonc.2021.670490), 2021-05-17

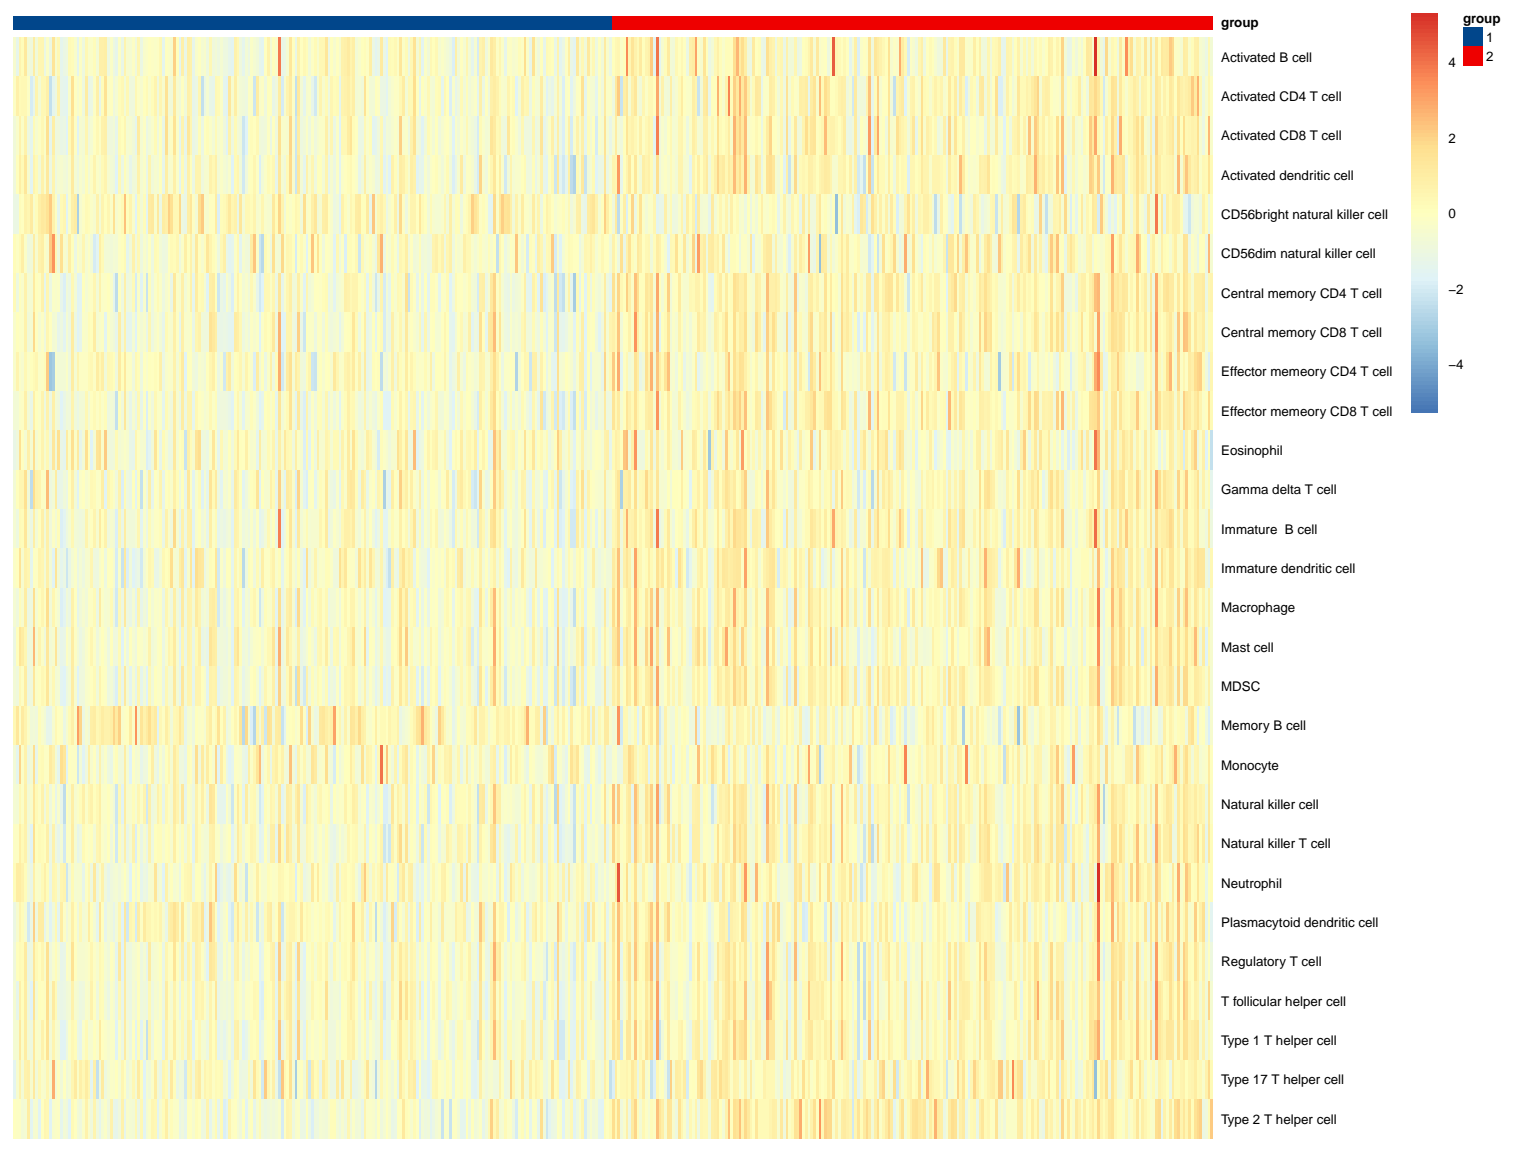

Supplement: Image_4.pdf [file Image_4.pdf]
